# Supplementary material
Source: PubMed Central journal article supplement (PMC4308485)
Supplement: NIHMS645113-supplement-1.pdf [file NIHMS645113-supplement-1.pdf]

Supplementary Table 1: Yield of LFP and spike data from NeuroGrid recordings.

|                                                        | Rat Recording<br>mean±s.d.; (range)<br>n = 10 (cortex, C)<br>n = 3 (hippocampus, HC) | Intra-operative Human<br>Recording<br>mean±s.d.; (range)<br>n = 2 |
|--------------------------------------------------------|--------------------------------------------------------------------------------------|-------------------------------------------------------------------|
| Number of functional electrodes                        | 60                                                                                   | 60                                                                |
| Average number of electrodes yielding LFP              | HC: 39.7±24.0 (12 – 54)<br>C: 57.0±4.5 (47 – 60)                                     | 60 (for both patients)                                            |
| Average number of electrodes yielding spiking activity | HC: 33.7±19.3 (12 – 49)<br>C: 46.1±9.9 (33 – 56)                                     | 19.0±4.2 (16 – 22)                                                |
| Average number of spikes/channel/s                     | HC: 31.9±20.1 (6.2 – 101.2)<br>C: 22.4±3.5 (16.8 – 32.2)                             | 5.6±3.3 (2.9 – 11.8)                                              |
| Average number of clustered units per session          | HC: 33.3±11.6 (20 – 41)<br>C: 46.1±9.9 (33 – 56)                                     | Not applicable                                                    |
